# Supplementary material for: MYSM1/2A-DUB is an epigenetic regulator in human melanoma and contributes to tumor cell growth
Source: PubMed Central journal article supplement (PMC5620173; doi:10.18632/oncotarget.18617), 2017-06-27
Supplement: oncotarget-08-67287-s001.pdf [file oncotarget-08-67287-s001.pdf]

## MYSM1/2A-DUB is an epigenetic regulator in human melanoma and contributes to tumor cell growth

### SUPPLEMENTARY FIGURES

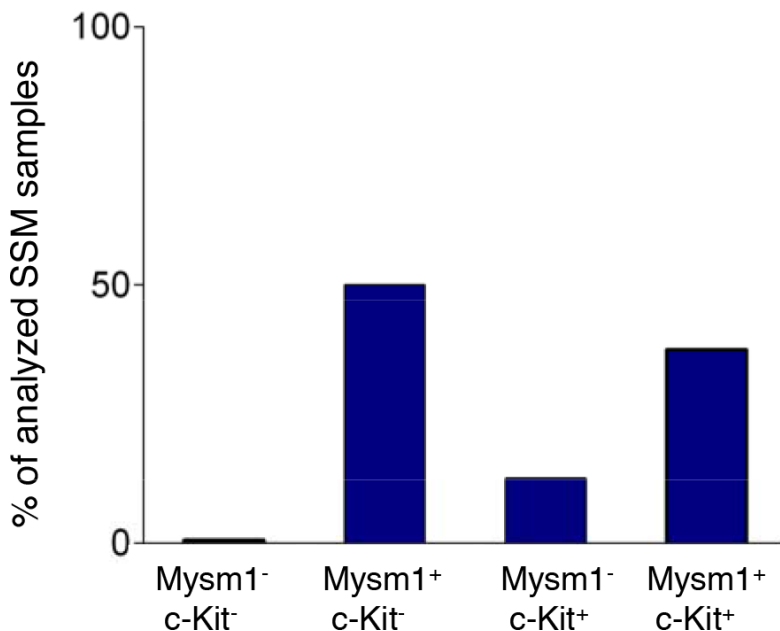

**Supplementary Figure 1: Co-expression of MYSM1 and c-KIT in human SSM samples.** Graphical illustration of the percentages of analyzed SSM samples containing MYSM1<sup>+</sup>c-KIT<sup>+</sup> double-positive cell in clusters *versus* SSM samples with either only MYSM1 or c-KIT expression (total n=8).

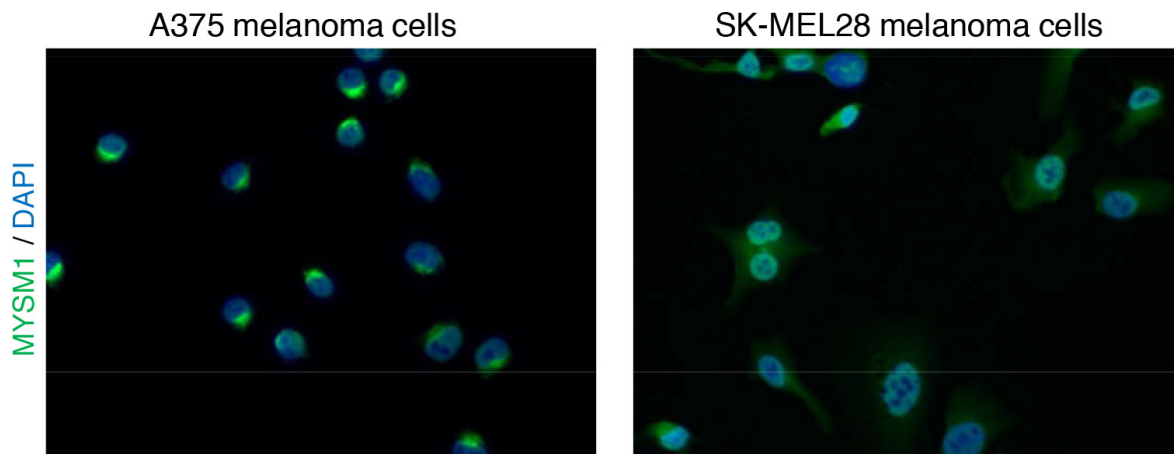

**Supplementary Figure 2: MYSM1 protein expression and localization in A375 and SK-MEL-28 melanoma cells.** MYSM1 localization in the nucleus of the majority of A375 and SK-MEL-28 melanoma cells. (MYSM1 in green, DAPI-stained nuclei blue, original magnification 40x, n>6, representative photos, not edited).

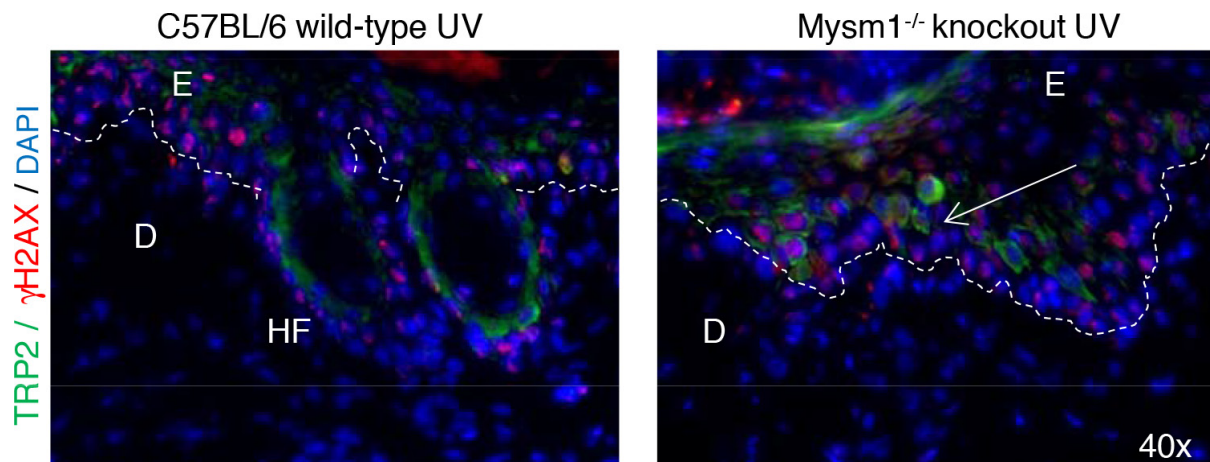

**Supplementary Figure 3: Analysis of cell types in the basal layer of UV-irradiated mouse skin.** Cryosections of murine skin from either C57BL/6 wild-type or *Mym1*<sup>tm1a/tm1a</sup> (MKO) mice UV-irradiated as described in Figure 3 were subjected to IF analysis with antibodies against γH2AX (red) and Tyrosine-related protein 2 (TRP2, in green). Despite some unspecific staining in the upper epidermis, individual cells could be identified as γH2AX<sup>+</sup>TRP2<sup>+</sup> double-positive melanocytes (white arrow) whereas the majority of γH2AX positive cells were basal keratinocytes (white dotted line shows the border of E:epidermis and D:dermis, HF: hair follicle, original magnification 40x, n≥3, selected images).

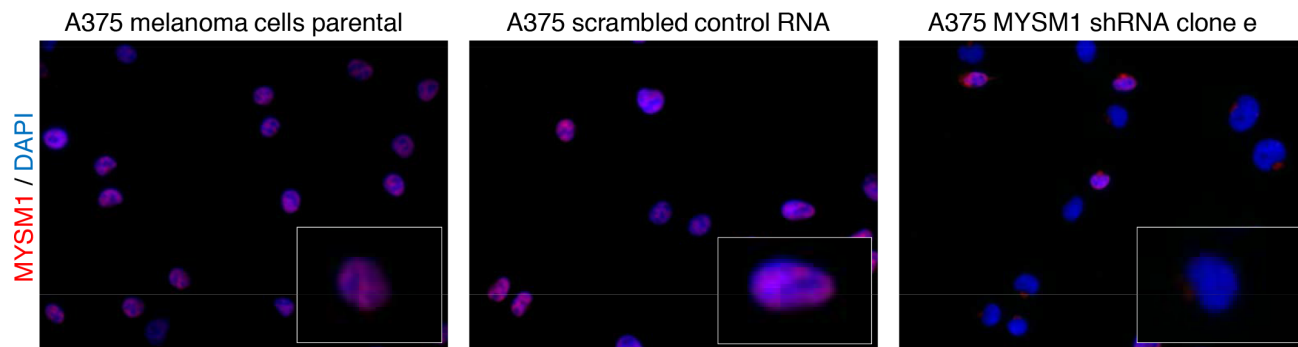

**Supplementary Figure 4: Knockdown of MYSM1 protein expression in A375 cells expressing *MYSM1* shRNA clones.** MYSM1 in red, DAPI-stained nuclei blue (original magnification 40x, n=8, representative images).

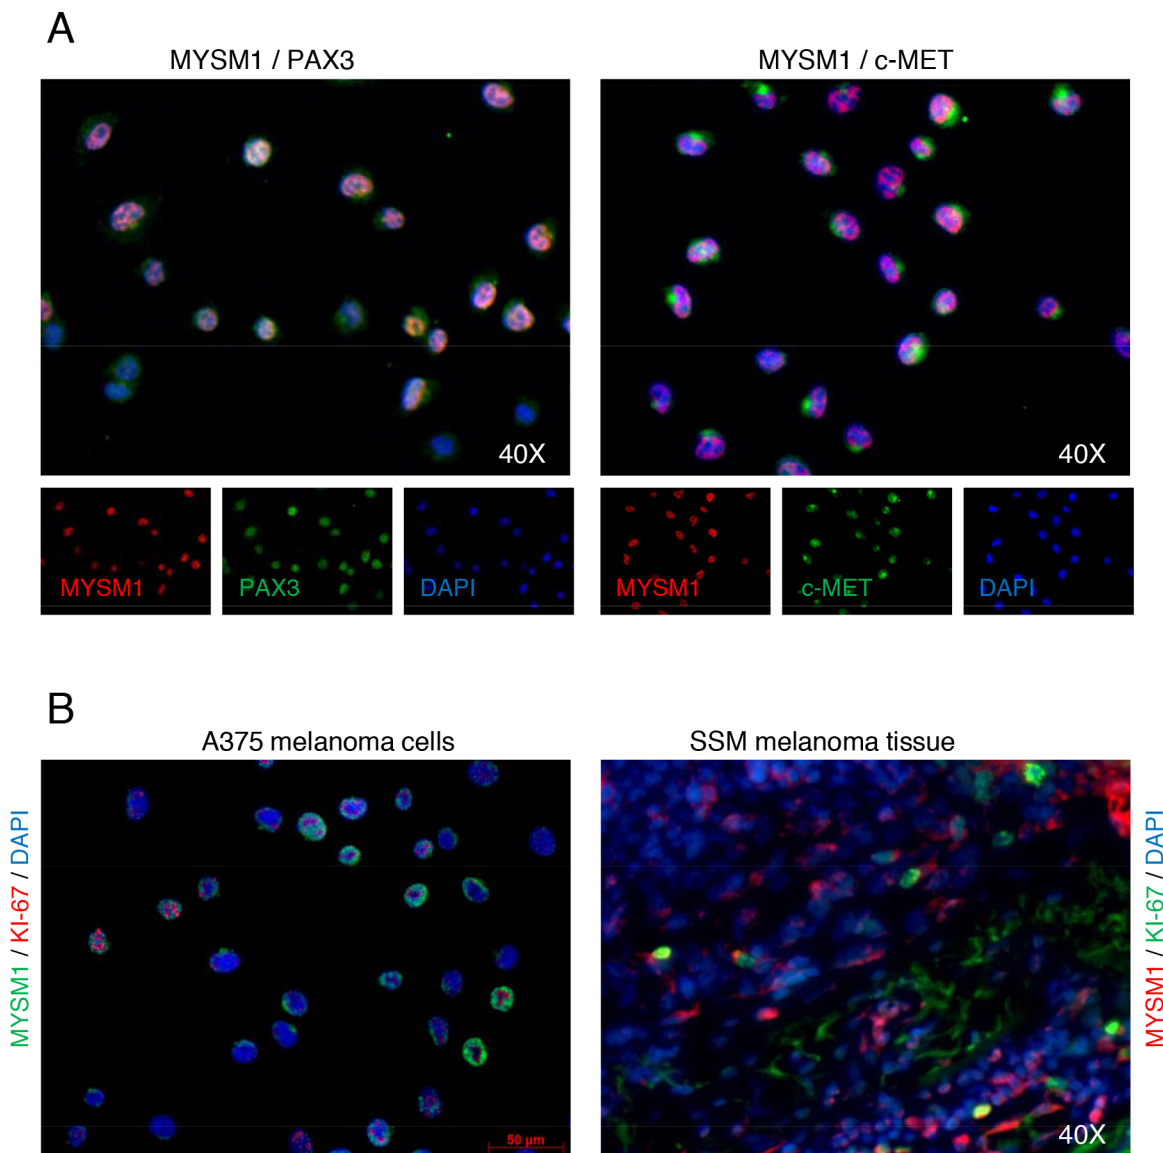

**Supplementary Figure 5: Co-localization of MYSM1 with PAX3 and c-MET in A375 melanoma cells and co-expression with Ki-67. (A)** IF analysis of co-localization of MYSM1 with PAX3 (right panel) and c-MET (left panel) in growing A375 cells (MYSM1 in red, PAX3 or c-MET in green, DAPI-stained nuclei blue). **(B)** Co-expression of MYSM1 and proliferation marker Ki-67 in A375 melanoma cells (right panel) and for comparison in SSM tissue (left panel). (MYSM1 and Ki-67 in green or red as indicated next to the images, DAPI-stained nuclei blue). In A. and B.: original magnification 40x, n>6, representative photos shown.
